# Supplementary material
Source: publisher figshare collection journal article supplement (https://gsajournals.figshare.com/ndownloader/files/13991162)
Supplement: Supplementary file 1 [file 13991162]

## Sheet: TableS9
Table S9 Summarized BUSCO benchmarking for M. baccata genome
	Category	Number	Percent (%)
Total BUSCO groups	-	956
BUSCOs aligned	Complete Single-copy BUSCOs	891	0.932008
	Complete Duplicated BUSCOs	416	0.435146
	Fragmented BUSCOs	24	0.0251046
	Missing BUSCOs	41	0.042887
